# Supplementary material
Source: MDPI journal article supplement (https://www.mdpi.com/2071-1050/15/8/6365)
Supplement: s1 [file s1]

**Table S1.** List of constructs indicators.

|                                     | Construct                                                                                                                                                                         | Source |
|-------------------------------------|-----------------------------------------------------------------------------------------------------------------------------------------------------------------------------------|--------|
| <b>Knowledge Management (KM)</b>    |                                                                                                                                                                                   |        |
| KM1                                 | Our employees obtain a good extent of new knowledge from external sources (e.g., through seminars, conferences, educational courses, subscription journals, expert networks)      | [61]   |
| KM2                                 | Our employees obtain a good extent of new knowledge from business partners (e.g., suppliers, clients)                                                                             |        |
| KM3                                 | Our employees exchange knowledge with their co-workers                                                                                                                            |        |
| KM4                                 | In their work, our employees rely on experience, skills, and knowledge                                                                                                            |        |
| KM5                                 | In their work, our employees rely on written sources (e.g., previously implemented projects documentation, organizational procedures, instructions, and other documented sources) |        |
| KM6                                 | Our employees share their knowledge orally at meetings or informal gatherings (e.g., during lunch, in the hallway)                                                                |        |
| KM7                                 | Our employees share their knowledge through formal procedures (e.g., project reports, organizational procedures and instructions, reports and company publications)               |        |
| KM8                                 | Employees in our firm consider their knowledge as an organizational asset and not their own source of strength                                                                    |        |
| <b>Organizational Learning (OL)</b> |                                                                                                                                                                                   |        |
| OL1                                 | In this firm, managers frequently involve employees in important decisions                                                                                                        | [62]   |
| OL2                                 | Policies are significantly influenced by the view of employees                                                                                                                    |        |
| OL3                                 | People feel involved in the main company                                                                                                                                          |        |
| OL4                                 | Employee learning is considered more of an expense than an investment                                                                                                             |        |
| OL5                                 | Senior managers in our firm resist change and are afraid of new ideas*                                                                                                            |        |
| OL6                                 | Managers in this firm can accept criticism without becoming overly defensive                                                                                                      |        |
| OL7                                 | People here receive support and encouragement when presenting new ideas                                                                                                           |        |
| OL8                                 | Innovative ideas that work is often rewarded by management                                                                                                                        |        |
| OL9                                 | Experiences and ideas provided by external sources (advisors, customers, training firms, etc.) are considered a useful instrument for this firm’s learning                        |        |
| OL10                                | From my experience, people who are new in this firm are encouraged to question the way things are done                                                                            |        |
| OL11                                | People are encouraged to take risks in this organization                                                                                                                          |        |
| OL12                                | People here often venture into unknown territory                                                                                                                                  |        |
| OL13                                | Senior managers in this firm tolerate risk and accept its consequence                                                                                                             |        |
| OL14                                | There are systems and procedures for receiving, collating, and sharing information from outside the company                                                                       |        |
| OL15                                | People are encouraged to interact with the environment: competitors, customers, technological institutes, universities, suppliers, etc.                                           |        |
| OL16                                | From my experience, this firm neglects strategies and progression of competitors*                                                                                                 |        |
| OL17                                | It is part of the work of all staff to collect, bring back, and report information about what is going on outside the company                                                     |        |
| OL18                                | From my experience, this firm accords new technology very late*                                                                                                                   |        |
| OL19                                | In this firm, teamwork is a usual way to work                                                                                                                                     |        |
| OL20                                | In this firm, employees are encouraged to communicate                                                                                                                             |        |

|      | Construct                                                                                                                                                                                             | Source |
|------|-------------------------------------------------------------------------------------------------------------------------------------------------------------------------------------------------------|--------|
| OL21 | Employees have the chance to talk among themselves about new ideas, programs, and activities that might be of use to the firm                                                                         |        |
| OL22 | New work processes that may be useful to the firm as a whole are usually shared with all employees                                                                                                    |        |
| OL23 | The firm has instruments (manuals, databases, files, organizational routines, etc.) that allow what has been learnt in past situations to remain valid, although the employees are no longer the same |        |

### Organizational Innovation (OI)

|      |                                                                                                                              |      |
|------|------------------------------------------------------------------------------------------------------------------------------|------|
| OI1  | In new product and service introductions, our company is often first-to-market                                               |      |
| OI2  | Our new products and services are often perceived as a very novel by customers                                               |      |
| OI3  | In comparison with our competitors, our company has introduced more innovative products and services during the past 5 years |      |
| OI4  | In comparison with our competitors, our company has a lower success rate in new products and services launch*                |      |
| OI5  | Our recent new products and services are only minor changes from our previous products and services*                         |      |
| OI6  | New products and services in our company often take us up against new competitors                                            |      |
| OI7  | In comparison with our competitors, our products' most recent marketing programme is revolutionary in the market             |      |
| OI8  | In new product and service introductions, our company is often at the cutting edge of technology                             |      |
| OI9  | Our firm's R&D or product development resources are not adequate to handle the development need of new products and services |      |
| OI10 | Key executives of the firm are willing to take risks to seize and explore "chancy" growth opportunities                      | [63] |
| OI11 | Senior executives constantly seek unusual, novel solutions to problems via the use of "idea men"                             |      |
| OI12 | When we see new ways of doing things, we are last at adopting them                                                           |      |
| OI13 | We are constantly improving our business processes                                                                           |      |
| OI14 | Our company changes production methods at a great speed in comparison with our competitors                                   |      |
| OI15 | During the past five years, our company has developed many new management approaches                                         |      |
| OI16 | When we cannot solve a problem using conventional methods, we improvise on new methods                                       |      |
| OI17 | We get a lot of support from managers if we want to try new ways of doing things                                             |      |
| OI18 | In our company, we tolerate individuals who do things in a different way                                                     |      |
| OI19 | We are willing to try new ways of doing things and seek unusual, novel solutions                                             |      |
| OI20 | We encourage people to think and behave in original and novel ways                                                           |      |

### Technological Capability (TC)

|     |                                                                         |      |
|-----|-------------------------------------------------------------------------|------|
| TC1 | Our firm uses technology to increase the company's productivity         |      |
| TC2 | Our firm uses technology to lower the cost of production                | [64] |
| TC3 | Our firm uses technology to develop a number of new products every year |      |

|      | Construct                                                                                                     | Source |
|------|---------------------------------------------------------------------------------------------------------------|--------|
| TC4  | Our firm uses technology to modify the features and specifications of existing products                       |        |
| TC5  | Our firm always makes relatively heavy investment in Research and Development activities                      |        |
| TC6  | On-the-job training is provided in our firm to improve the technical skills of employees                      |        |
| TC7  | Our firm is qualified to attract and motivate talented experts in R&D                                         |        |
| TC8  | Our firm has a strong capability to integrate external technological resources with our in-house resources    |        |
| TC9  | Our firm has a strong capability to integrate internal technological competency with other in-house resources |        |
| TC10 | Our firm has the skills needed to transmit information, skills, and technology to our major suppliers         |        |
| TC11 | Our firm is skilful in absorbing and applying new technology to problem-solving                               |        |
| TC12 | Our firm is one of the leaders in our primary industry to establish and upgrade technology standards          |        |
| TC13 | Our firm always uses new technology to do something unique                                                    |        |
| TC14 | Our firm always uses technology to create new knowledge and competencies unavailable elsewhere                |        |
| TC15 | Our firm has accumulated stronger and various technological skills                                            |        |
| TC16 | Our firm always leads the technology innovation of the principle industry in which we operate                 |        |

\* Reverse-coded item

(Sources:[61–64])
